# Supplementary material
Source: publisher site journal article supplement (https://www.dovepress.com/article/230589)
Supplement: Supplementary file 1 [file get_supplementary_file.php]

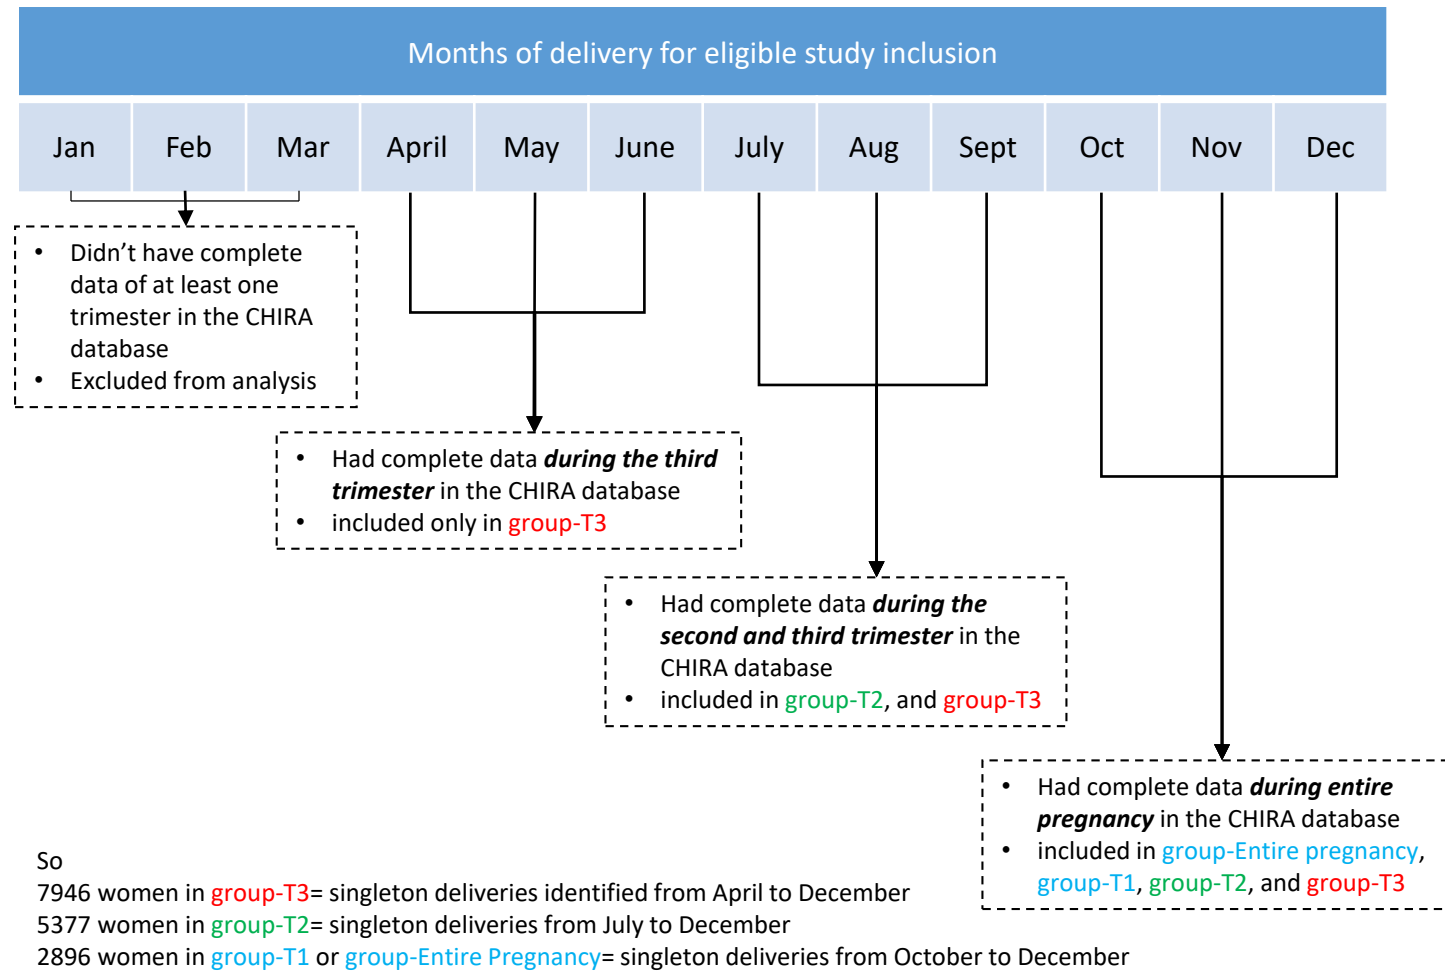

Supplementary material 1 Detailed information of sample extraction process

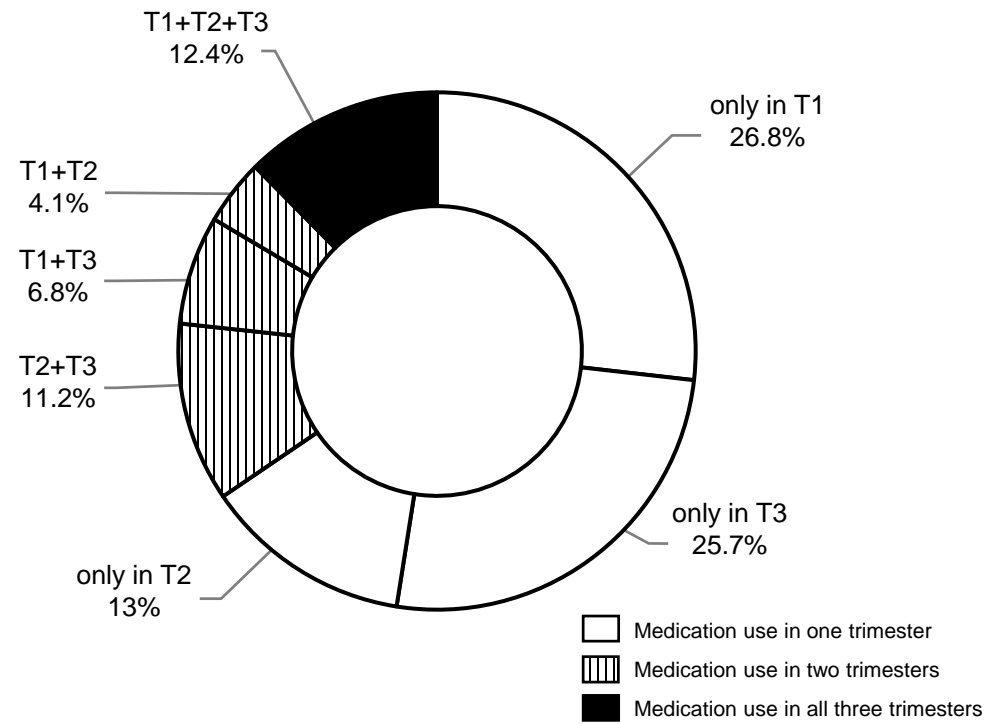

Supplemental material 2 The use of medications in each trimester among the users from Group-Entire Pregnancy

Supplementary material 3 Most commonly used Western medicines (ATC 3<sup>rd</sup> level) among medication users in each group (%) <sup>a</sup>

| ATC 3 <sup>rd</sup> level                                                     | Women<br>observed during<br>the entire<br>Pregnancy | Women in each trimester<br>group |      |      |  |
|-------------------------------------------------------------------------------|-----------------------------------------------------|----------------------------------|------|------|--|
|                                                                               |                                                     | T1                               | T2   | T3   |  |
| B: Blood and blood forming organs                                             |                                                     |                                  |      |      |  |
| B05C-irrigating solutions                                                     | 28.6                                                | 9.4                              | 23.7 | 26.5 |  |
| B05X-i.v. solution additives                                                  | 24.5                                                | 12.9                             | 16.3 | 20.6 |  |
| B05B-i.v. solutions                                                           | 14.8                                                | 8.2                              | 5.9  | 10.1 |  |
| B03A-iron preparations                                                        | 13.9                                                | /                                | 12.6 | 25.5 |  |
| B03B-vitamin B12 and folic acid                                               | 5.3                                                 | 7.1                              | 2.2  | 2.0  |  |
| B01A-antithrombotic agents                                                    | 5.0                                                 | 2.9                              | 2.6  | 3.6  |  |
| B02B-vitamin K and other hemostatics                                          | 3.5                                                 | 1.2                              | 2.6  | 2.6  |  |
| A: Alimentary tract and metabolism                                            |                                                     |                                  |      |      |  |
| A11G-ascorbic acid (vitamin C), incl. combinations                            | 17.4                                                | 7.7                              | 11.9 | 15.6 |  |
| A11A-multivitamins, combinations                                              | 14.8                                                | 9.4                              | 22.2 | 16.2 |  |
| A11H-other plain vitamin preparations                                         | 9.7                                                 | 10.0                             | 8.15 | 3.2  |  |
| A12B-potassium                                                                | 8.9                                                 | 6.5                              | 6.3  | 3.6  |  |
| A12C-other mineral supplements                                                | 7.1                                                 | 1.2                              | 6.7  | 8.5  |  |
| A02B-drugs for peptic ulcer and gastro-oesophageal reflux disease (GORD)      | 5.3                                                 | 2.9                              | 4.1  | 3.4  |  |
| G: Genito urinary system and sex hormones                                     |                                                     |                                  |      |      |  |
| G03D-progestogens                                                             | 32.5                                                | 53.5                             | 10.0 | 3.0  |  |
| G01A-anti-infectives and antiseptics, excl. combinations with corticosteroids | 4.1                                                 | 1.2                              | 4.4  | 3.4  |  |
| G02C-other gynecologicals                                                     | 3.2                                                 | 1.8                              | 1.9  | 3.4  |  |
| J: Antiinfectives for systemic use                                            |                                                     |                                  |      |      |  |
| J01D-other beta-lactam antibacterials                                         | 17.1                                                | 10.6                             | 13.3 | 13.6 |  |
| J01C-beta-lactam antibacterials, penicillins                                  | 9.7                                                 | 4.7                              | 6.3  | 6.3  |  |
| J01F-macrolides, lincosamides and streptogramins                              | 7.7                                                 | 6.5                              | 5.2  | 2.8  |  |

|                                                                        |     |     |     |     |
|------------------------------------------------------------------------|-----|-----|-----|-----|
| J05A-direct acting antivirals                                          | 3.5 | 1.2 | 2.6 | 1.6 |
| J01X-other antibacterials                                              | 3.2 | 2.4 | 1.5 | 2.0 |
| H: Systemic hormonal preparations, excluding sex hormones and insulins |     |     |     |     |
| H02A-corticosteroids for systemic use, plain                           | 9.1 | 1.8 | 2.6 | 8.9 |
| H03A-thyroid preparations                                              | 4.1 | 4.1 | 5.2 | 5.5 |
| V: Various                                                             |     |     |     |     |
| V07A-all other non-therapeutic products                                | 7.1 | 2.9 | 0.7 | 6.5 |
| V06D-other nutrients                                                   | 5.6 | 2.9 | 5.6 | 6.3 |
| N: Nervous system                                                      |     |     |     |     |
| N02B-other analgesics and antipyretics                                 | 4.7 | 3.5 | 1.9 | 3.6 |
| R: Respiratory system                                                  |     |     |     |     |
| R05C-expectorants, excl. combinations with cough suppressants          | 3.2 | 1.8 | 1.5 | 2.8 |
| C: Cardiovascular system                                               |     |     |     |     |
| C01B-antiarrhythmics, class I and III                                  | 3.2 | 1.2 | 2.2 | 2.8 |

<sup>a</sup> Medications most commonly used at ATC 3<sup>rd</sup> level with a prevalence in any period of greater than 5% were selected

ATC: the WHO Anatomical Therapeutic Chemical drug classification system.

Supplementary material 4 Most commonly used Western medicines among medication users in each group (%)

| Rank | Generic name                   | Women<br>observed<br>during the<br>entire<br>Pregnancy | Women in each<br>trimester group |      |      |
|------|--------------------------------|--------------------------------------------------------|----------------------------------|------|------|
|      |                                |                                                        | T1                               | T2   | T3   |
| 1    | glucose                        | 28.9                                                   | 9.4                              | 25.6 | 27.1 |
| 2    | sodium chloride                | 23.9                                                   | 12.4                             | 15.9 | 20.2 |
| 3    | progesterone                   | 23.6                                                   | 40.0                             | 5.2  | 2.0  |
| 4    | ascorbic acid (vit C)          | 17.1                                                   | 7.1                              | 11.9 | 15.6 |
| 5    | dydrogesterone                 | 12.4                                                   | 20.0                             | 4.8  | 1.6  |
| 6    | iron polysaccharide complex    | 10.9                                                   | /                                | 8.9  | 19.6 |
| 7    | calcium carbonate + vitamin D3 | 10.0                                                   | 2.4                              | 18.5 | 13.6 |
| 8    | dexamethasone                  | 8.9                                                    | 1.2                              | 2.2  | 8.7  |
| 9    | potassium chloride             | 8.3                                                    | 5.9                              | 5.9  | 3.4  |
| 10   | glucose + sodium chloride      | 7.7                                                    | 3.5                              | 3.7  | 3.6  |
| 11   | sterile water                  | 7.1                                                    | 2.9                              | 0.7  | 6.5  |
| 12   | pyridoxine (vit B6)            | 6.5                                                    | 4.1                              | 5.6  | 2.8  |
| 13   | magnesium sulfate              | 6.2                                                    | /                                | 6.3  | 8.5  |
| 14   | compound sodium chloride       | 4.7                                                    | 3.5                              | 2.2  | 3.0  |
| 15   | amoxicillin                    | 4.4                                                    | 2.4                              | 3.0  | 1.6  |
| 16   | levothyroxine                  | 4.1                                                    | 3.5                              | 5.2  | 5.5  |
| 17   | compound amino acid            | 3.8                                                    | 2.4                              | 1.1  | 2.6  |
| 17   | Ringer lactate                 | 3.8                                                    | 1.2                              | 1.5  | 3.4  |
| 19   | azithromycin                   | 3.5                                                    | 2.9                              | 1.5  | 1.8  |
| 19   | cefuroxime                     | 3.5                                                    | 0.6                              | 3.3  | 4.4  |
| 21   | tocopherol (vit E)             | 3.2                                                    | 5.9                              | 2.6  | 0.4  |
| 21   | lidocaine                      | 3.2                                                    | 1.2                              | 2.2  | 2.8  |
| 23   | omeprazole                     | 3.0                                                    | 1.8                              | 2.2  | 1.8  |
| 23   | oxytocin                       | 3.0                                                    | 1.2                              | 0.4  | 4.0  |
| 23   | heparin                        | 3.0                                                    | 0.6                              | 0.7  | 2.8  |
| 23   | ceftriaxone                    | 3.0                                                    | 0.6                              | 1.5  | 1.4  |
| 27   | vitamin complex                | 2.7                                                    | 4.1                              | 1.9  | 1.4  |
| 27   | cefathiamidine                 | 2.7                                                    | 2.4                              | 1.9  | 1.6  |
| 27   | clindamycin                    | 2.7                                                    | 1.2                              | 2.6  | 0.6  |
| 30   | clotrimazole                   | 2.4                                                    | 1.2                              | 4.4  | 2.2  |
| 30   | ambroxol                       | 2.4                                                    | 0.6                              | 0.4  | 2.6  |
| 30   | benzylpenicillin               | 2.4                                                    | /                                | 1.5  | 3.2  |
| 30   | ritodrine                      | 2.4                                                    | /                                | 1.1  | 3.2  |
| 34   | cyanocobalamin (vit B12)       | 2.1                                                    | 3.5                              | 1.1  | 1.0  |
| 34   | ferrous succinate              | 2.1                                                    | /                                | 2.6  | 3.4  |
| 36   | folic acid                     | 1.8                                                    | 2.4                              | 0.4  | 0.6  |
| 36   | compound paracetamol           | 1.8                                                    | 1.2                              | /    | 1.0  |

| Rank | Generic name                                      | Women<br>observed<br>during the<br>entire<br>Pregnancy | Women in each<br>trimester group |     |     |
|------|---------------------------------------------------|--------------------------------------------------------|----------------------------------|-----|-----|
|      |                                                   |                                                        | T1                               | T2  | T3  |
| 36   | mecobalamin                                       | 1.8                                                    | 1.2                              | 1.1 | 0.6 |
| 36   | sodium potassium magnesium<br>calcium and glucose | 1.8                                                    | 1.2                              | 0.7 | 0.6 |
| 36   | cefixime                                          | 1.8                                                    | 1.2                              | 1.5 | 1.2 |
| 36   | amoxicillin + clavulanate potassium               | 1.8                                                    | 0.6                              | 0.7 | 0.8 |
| 36   | cefazolin                                         | 1.8                                                    | 0.6                              | 1.1 | 1.4 |
| 36   | phytomenadione (vit K1)                           | 1.8                                                    | 0.6                              | 0.7 | 1.8 |
| 36   | levofloxacin                                      | 1.8                                                    | 0.6                              | 1.1 | 1.2 |
